# Supplementary material
Source: publisher figshare collection journal article supplement (https://acs.figshare.com/ndownloader/files/5025238)
Supplement: Supplementary file 1 [file 5025238]

## Tuning Complexity by Lithiation: A Family of Intergrowth Structures Using Condensed *Hypho*-Icosahedra in the Li-Doped Ca-Zn System

Qisheng Lin,<sup>†\*</sup> Ran Zhu<sup>‡</sup> and Gordon J. Miller<sup>†‡</sup>

<sup>†</sup>Division of Materials Science and Engineering, Ames Laboratory, US-DOE, Ames, Iowa, 50011 U.S.A.

<sup>‡</sup>Department of Chemistry, Iowa State University, Ames, Iowa, 50011 U.S.A.

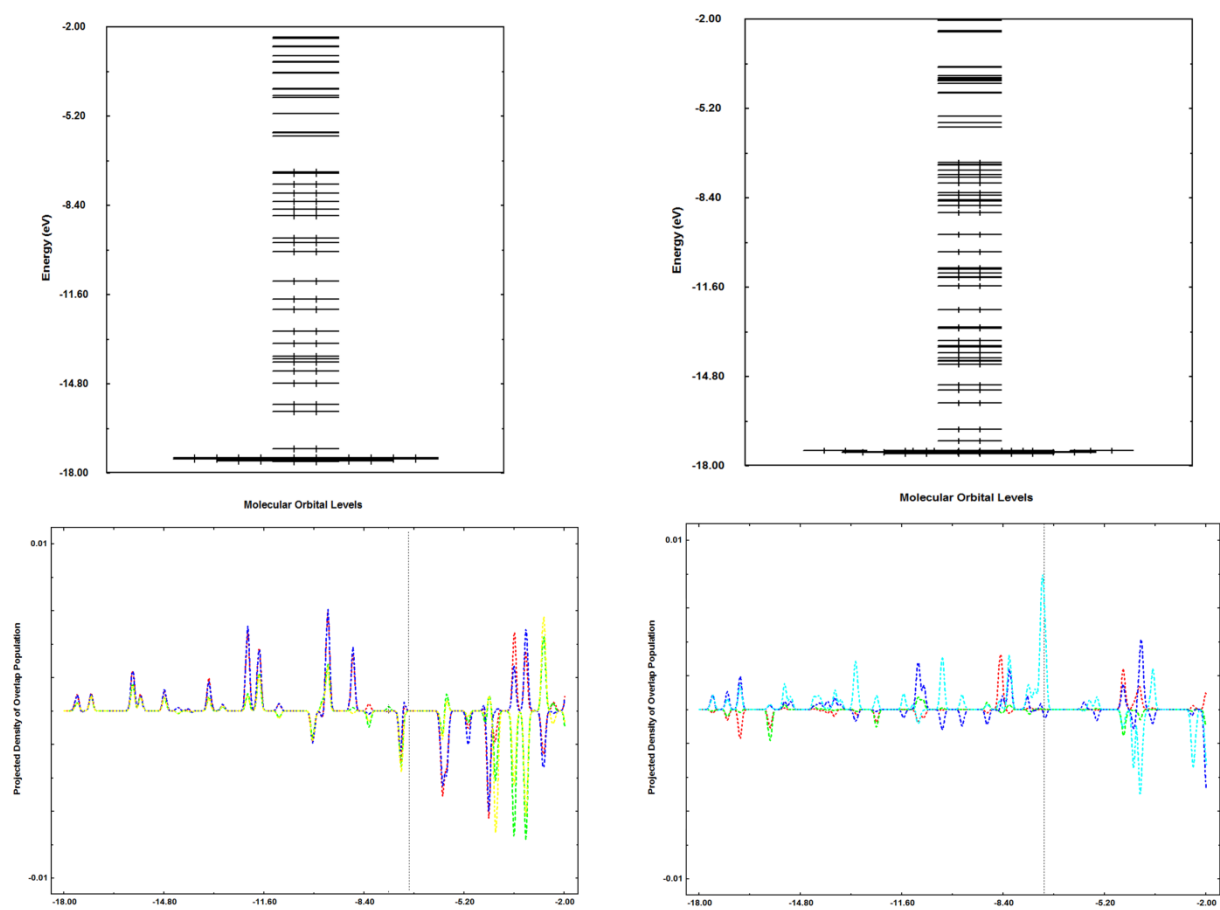

Figure S1. MO and COOP data for isolated  $\text{Zn}_2@\text{Zn}_{15}^{22-}$  and  $\text{LiZn}_2@\text{Zn}_{24}^{31-}$  clusters.

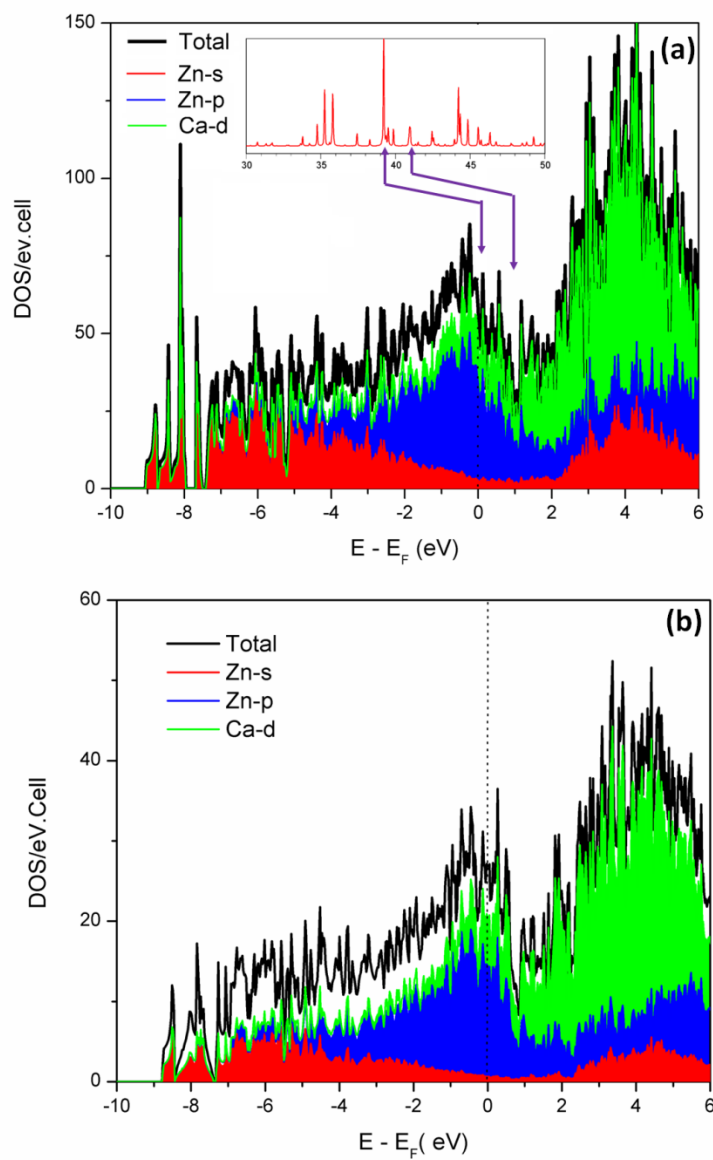

Figure S2. DOS patterns of hypothetical models of (a) “ $\text{Ca}_{15}\text{Li}_{18}\text{Zn}_{57}$ ” for the hexagonal  $\text{Ca}_{15}\text{Li}_x\text{Zn}_{75-x}$  and (b) “ $\text{Ca}_{12}\text{Li}_{15}\text{Zn}_{44}$ ” for the trigonal  $\text{Ca}_{12}\text{Li}_x\text{Zn}_{59-x}$  structure. The relationship between X-ray diffraction peaks and pseudogaps around the Fermi energy is also shown for the former model.

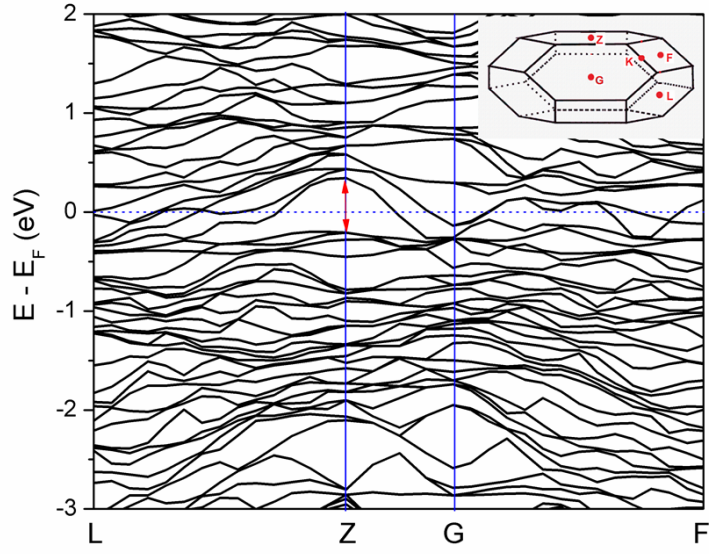

(a)

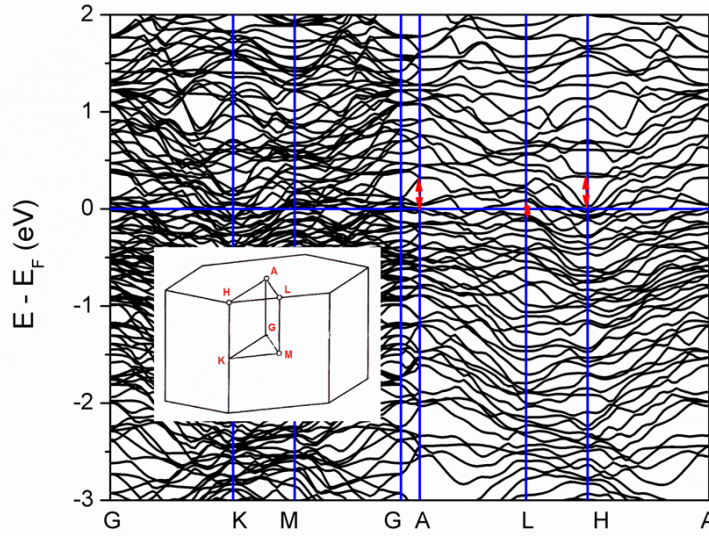

(b)

Figure S3. The band structure of (a) hypothetical “ $\text{Ca}_{12}\text{LiZn}_{58}$ ” ( $R\bar{3}m$ ) and (b) “ $\text{Ca}_{15}\text{Li}_{18}\text{Zn}_{57}$ ” ( $P6_3/mmc$ ) models. Red marks denote energy gaps around Fermi energy along (001) for both structures.
